# Supplementary material
Source: PubMed Central journal article supplement (PMC2856709)

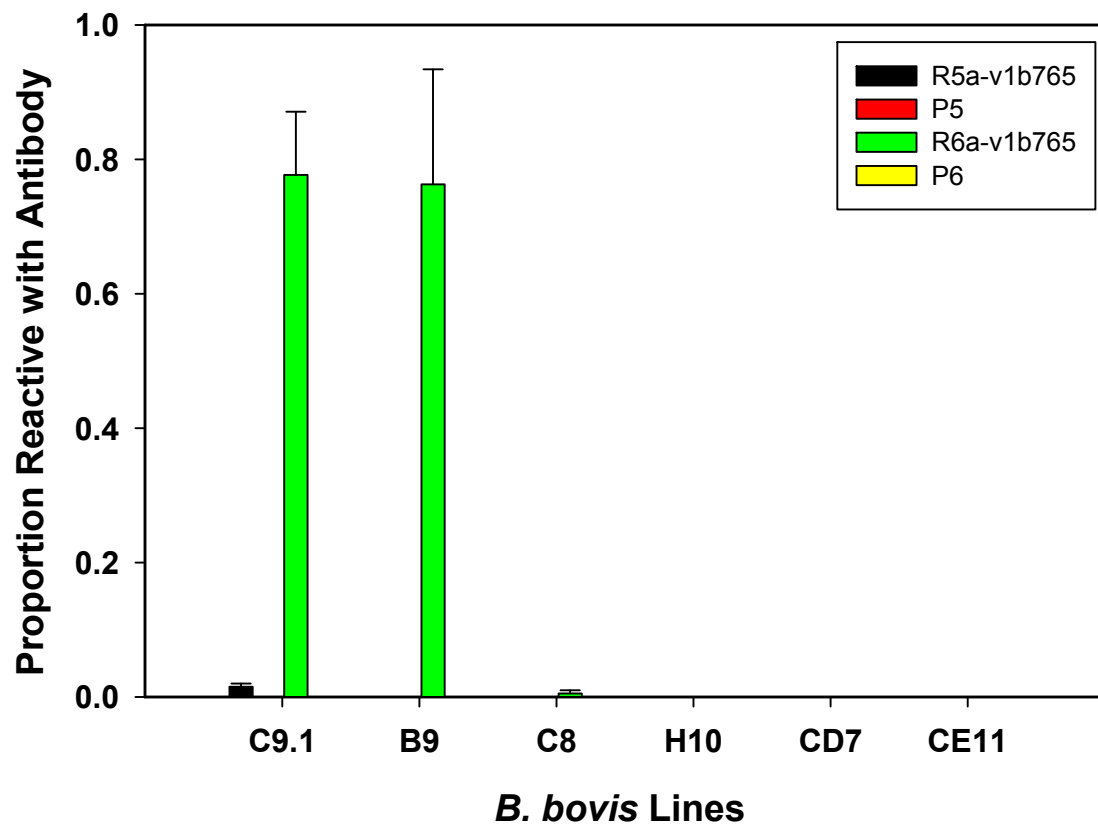

Supplement: NIHMS187303-supplement-01.pdf [file NIHMS187303-supplement-01.pdf]
